# Supplementary material
Source: publisher figshare collection journal article supplement (https://tandf.figshare.com/ndownloader/files/30926656)
Supplement: Supplementary file 2 [file 30926656]

Archive with 2 entries (2 files):
- Revised Online Supplementary Appendix June 2019.pdf
- CODE_DATA.zip
